# Supplementary material for: Efficient photo-assisted Fenton-like reaction of yolk–shell CuSe(Cu2Se)/g-C3N4 heterojunctions for methylene blue degradation
Source: Royal Society of Chemistry journal article supplement (doi:10.1039/d2ra08309d), 2023-01-01
Supplement: d2ra08309d1.pdf [file d2ra08309d1.pdf]

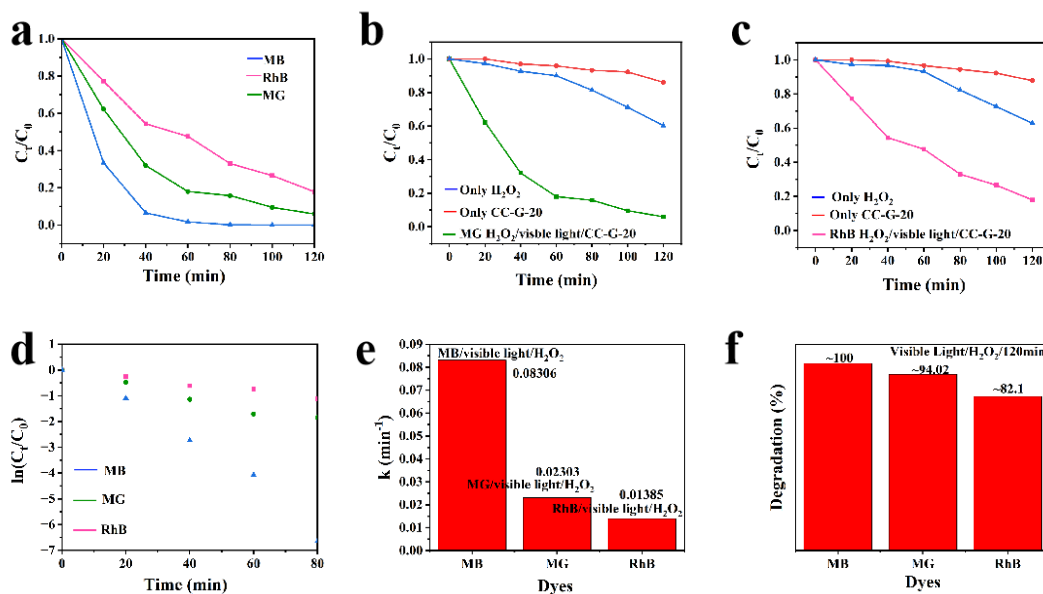

**Fig. A1.** (a-c) Degradation of dyes under different conditions. (d)  $\ln(C_t/C_0)$  of different catalytic systems (CC-G-20/dyes/visible light/ $\text{H}_2\text{O}_2$  systems) varied with the reaction time. (e) Reaction rate constants of different catalytic systems in A1 (d). (f) Degradation efficiency of different catalytic systems in A1.
