# Supplementary material for: Efficient photo-assisted Fenton-like reaction of yolk–shell CuSe(Cu2Se)/g-C3N4 heterojunctions for methylene blue degradation
Source: Royal Society of Chemistry journal article supplement (doi:10.1039/d2ra08309d), 2023-01-01
Supplement: d2ra08309d2.pdf [file d2ra08309d2.pdf]

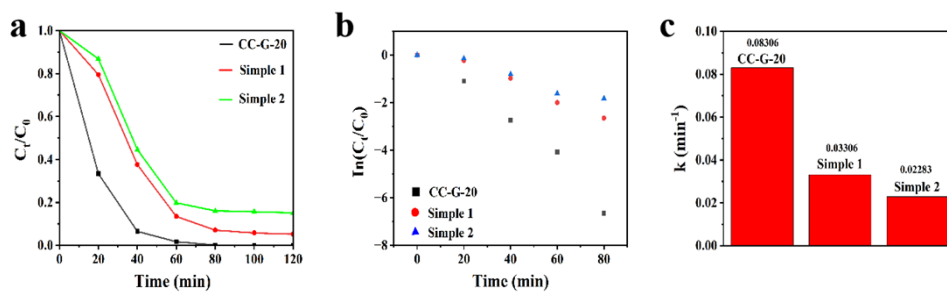

**Fig. A2.** (a) MB degradation of CC-G-20, simple 1, and simple 2. (b)  $\ln(C_t/C_0)$  of CC-G-20, simple 1, and simple 2. Reaction rate constants of three materials in A1 (b).
