# Supplementary material for: Efficient photo-assisted Fenton-like reaction of yolk–shell CuSe(Cu2Se)/g-C3N4 heterojunctions for methylene blue degradation
Source: Royal Society of Chemistry journal article supplement (doi:10.1039/d2ra08309d), 2023-01-01
Supplement: d2ra08309d3.pdf [file d2ra08309d3.pdf]

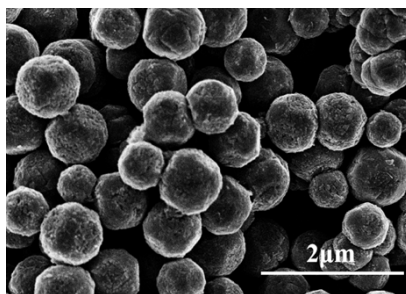

**Fig. A3.** SEM image of  $\text{Cu}_2\text{O/g-C}_3\text{N}_4$ .

(Note: The experiment found that this sample also has certain catalytic ability for methyl orange. Because it is not in the scope of this paper, so it is not written here.)
