# Supplementary figures and images for: Efficient photo-assisted Fenton-like reaction of yolk–shell CuSe(Cu2Se)/g-C3N4 heterojunctions for methylene blue degradation
Source: Royal Society of Chemistry journal article supplement (doi:10.1039/d2ra08309d), 2023-01-01

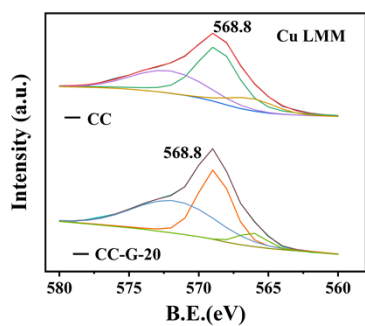

**Fig.A4.** XPS spectra of CC-G-20 referred to the parent CC. Auger spectrum.

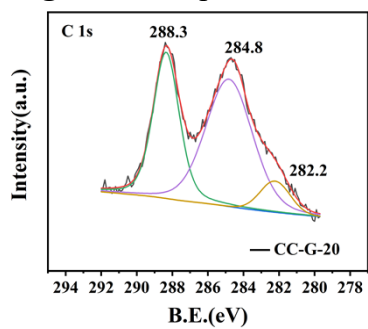

**Fig. 3b.** C 1s re-analyzed.

Supplement: d2ra08309d4.pdf [file d2ra08309d4.pdf]

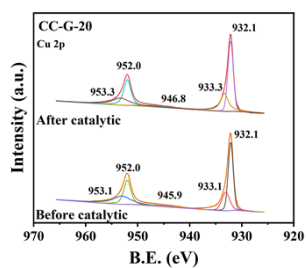

Fig. A5. XPS spectra of CC-G-20. The binding energy of CC-G-20 before and after catalysis.

Supplement: d2ra08309d5.pdf [file d2ra08309d5.pdf]
